# Supplementary material for: Effect of cationic molecules on the oxygen reduction reaction on fuel cell grade Pt/C (20 wt%) catalyst in potassium hydroxide (aq, 1 mol dm−3)
Source: Royal Society of Chemistry journal article supplement (doi:10.1039/c4cp04973j), 2015-01-01
Supplement: c4cp04973j1.pdf [file c4cp04973j1.pdf]

## Electronic Supplemental Information (ESI)

### Effect of cationic molecules on the oxygen reduction reaction on fuel cell grade Pt/C(20 wt%) catalyst in potassium hydroxide (aq, 1 mol dm<sup>-3</sup>)

Ai Lien Ong,\* Kenneth K. Inglis, Daniel K. Whelligan, Sam Murphy, and John R. Varcoe

#### Synthetic Schemes

6-(benzyloxy)-N,N,N-trimethylhexan-1-aminium chloride (BOTMHA) and 1-benzyl-4-aza-1-azoniabicyclo[2.2.2]octane chloride (BAABCO) were synthesised as previously reported.<sup>1</sup> 1-(4-methylbenzyl)trimethylammonium chloride (MBTMA), 1-(4-methylbenzyl)-3-methylimidazolium chloride (MBMI), 1-(4-methylbenzyl)-4-aza-1-azoniabicyclo[2.2.2]octane chloride (MBAABCO), 1-(4-methylbenzyl)-1-azoniabicyclo[2.2.2]octane chloride (MBABCO), and benzyltris(2,4,6-trimethoxyphenyl)phosphonium chloride (BTTMPP) were synthesised as shown in Scheme ESII.

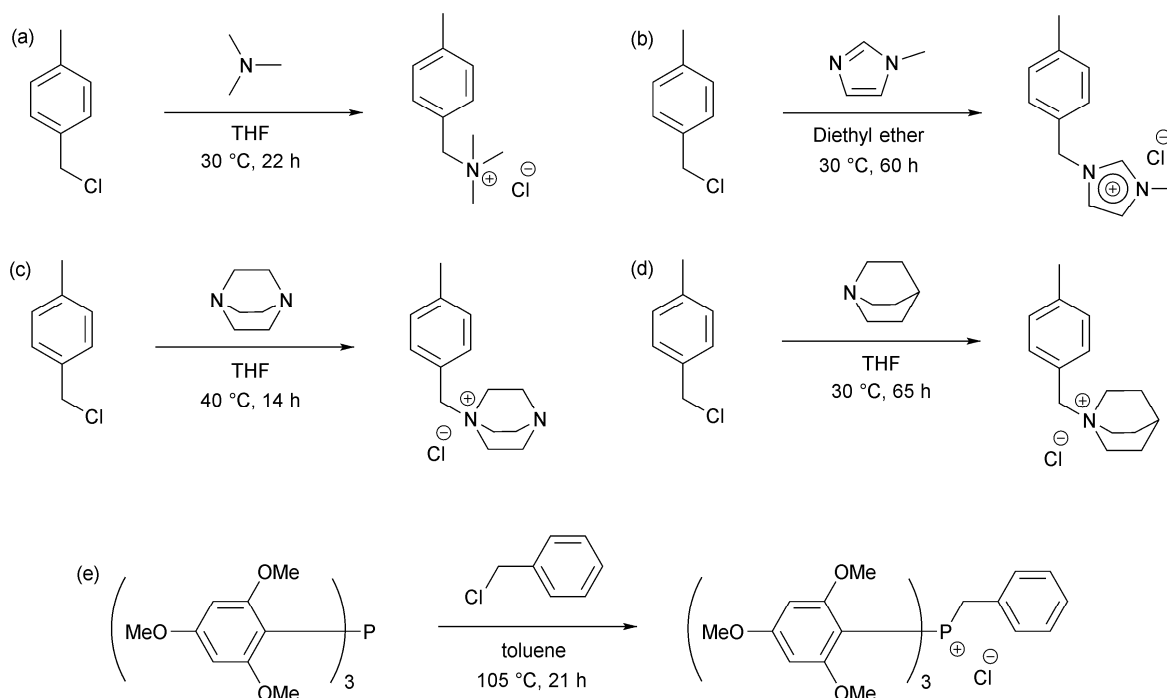

**Scheme ESII** The synthesis of: (a) 1-(4-methylbenzyl)trimethylammonium chloride (MBTMA), (b) 1-(4-methylbenzyl)-3-methylimidazolium chloride (MBMI), (c) 1-(4-methylbenzyl)-4-aza-1-azoniabicyclo[2.2.2]octane chloride (MBAABCO), (d) 1-(4-methylbenzyl)-1-azoniabicyclo[2.2.2]octane chloride (MBABCO), and (e) benzyltris(2,4,6-trimethoxyphenyl)phosphonium chloride (BTTMPP)

#### General Experimental

Starting materials, reagents and solvents for reactions were reagent grade and, unless otherwise stated, used as purchased. Toluene was distilled from sodium benzophenone ketyl under nitrogen. Infra-red (IR) spectra were recorded in the range 600-4000 cm<sup>-1</sup> using an Agilent Clary 600 FTIR spectrometer fitted with a MKII Golden Gate Single Reflection ATR System. Peaks for contaminant water, absorbed due to the hygroscopic nature of the compounds, have not been noted. NMR spectra were obtained on either a Bruker 500 MHz or Bruker 300 MHz spectrometer. <sup>1</sup>H NMR spectra were referenced to TMS at 0 ppm. The data is given as follows: chemical shift ( $\delta$ ) in ppm, integration, multiplicity, coupling constants ( $J$ , accurate to 0.3 Hz). <sup>13</sup>C spectra were referenced to TMS at 0 ppm. The data is given as follows: chemical shift ( $\delta$ ) in ppm, multiplicity. <sup>31</sup>P spectra were referenced to phosphoric acid at 0 ppm. The data is given as follows: chemical shift ( $\delta$ ) in ppm, multiplicity. Mass spectrometry (MS) used electrospray ionisation (ESI) and was carried out on either a Waters TOF MS; LCT Classic (Waters) or a Micromass Quattro Ultima Triple Quadrupole Mass Spectrometer (Micromass). The data is given as follows:  $m/z$ , % peak height, assignment.

**(a) 1-(4-methylbenzyl)trimethylammonium chloride (MBTMA)**

To 4-methylbenzyl chloride (2.655 g, 18.9 mmol) was added 100 mL of THF. This mixture was stirred at 30 °C, and an outlet from the vessel was attached to a bath of dilute hydrochloric acid. Trimethylamine gas was bubbled through the mixture over 2 h, and then the vessel was sealed and left for a further 20 h. [The trimethylamine gas was generated by dropping aqueous trimethylamine (45 wt. %) solution onto solid sodium hydroxide, using flowing nitrogen to carry it to the reaction vessel and then into the dilute acid.] The precipitate was washed with THF (2 × 25 mL) then with diethyl ether (2 × 25 mL). The solid was then dried under vacuum (3.06 g, 81%); IR (cm<sup>-1</sup>) 3027, 2962, 2923, 1635, 1616, 1478; <sup>1</sup>H-NMR (d<sub>6</sub>-DMSO) 7.50 (2 H, d, *J*=8.0 Hz), 7.39 (2 H, d, *J*=8.0 Hz), 4.59 (2 H, s), 3.09 (9 H, s), 2.43 (3 H, s); <sup>13</sup>C NMR (d<sub>6</sub>-DMSO) 139.8, 132.7, 129.3, 125.7, 67.0, 51.4, 20.8; MS (Micromass, ESI+) *m/z* = 365 (2%, [M<sub>2</sub><sup>37</sup>Cl]<sup>+</sup>), 363 (5%, [M<sub>2</sub><sup>35</sup>Cl]<sup>+</sup>), 165 (11%), 164 (87%, M<sup>+</sup>), 105 (100%, MeC<sub>6</sub>H<sub>4</sub>CH<sub>2</sub><sup>+</sup>). <sup>1</sup>H NMR data correlate approximately with those given in the literature in a different solvent (CDCl<sub>3</sub>).<sup>2</sup>

**(b) 1-(4-methylbenzyl)-3-methylimidazolium chloride (MBMI)**

To 1-methylimidazole (5.99 g, 73.0 mmol) was added 25 mL of diethyl ether, and 4-methylbenzyl chloride (8.50 g, 60.4 mmol). The mixture was stirred at 30 °C for 60 h, then cooled over ice and filtered. The solid was washed with diethyl ether (2 × 25 mL), and then dried under vacuum. The solid was recrystallized from THF /i>PrOH to give white crystals (4.72 g, 35%); IR (cm<sup>-1</sup>) 3131, 3080, 3015, 2985, 2950, 1562, 1517, 1445; <sup>1</sup>H-NMR (d<sub>6</sub>-DMSO) <sup>1</sup>H-NMR (d<sub>6</sub>-DMSO) 9.57 (1 H, s), 7.88 (1 H, s), 7.78 (1 H, s), 7.38 (2 H, d, *J*=8.0 Hz), 7.21 (2 H, d, *J*=8.0 Hz), 5.44 (2 H, s), 3.88, (3 H, s), 2.29 (3 H, s); <sup>13</sup>C NMR (d<sub>6</sub>-DMSO) 138.1, 136.7, 132.1, 129.4, 128.5, 123.8, 122.2, 51.4, 35.8, 20.7; MS (Micromass, ESI+) *m/z* = 188 (12%), 187 (100%, M<sup>+</sup>), 105 (83%, MeC<sub>6</sub>H<sub>4</sub>CH<sub>2</sub><sup>+</sup>).

**(c) 1-(4-methylbenzyl)-4-aza-1-azoniabicyclo[2.2.2]octane chloride (MBAABCO)**

To diazobicyclo[2.2.2]octane (5.09 g, 45.4 mmol) was added 20 mL of THF. This was heated to 40 °C and then a mixture of 4-methylbenzyl chloride (5.31 g, 37.8 mmol) and 25 mL of THF was added over 2 h. The mixture was then left for a further 12 h. The solid was filtered and washed with THF (2 × 25 mL) and diethyl ether (2 × 25 mL). The solid was then dried under vacuum (7.54 g, 79%); IR (cm<sup>-1</sup>) 3047, 3003, 2968, 2887, 1618, 1574, 1515, 1468, 1457; <sup>1</sup>H-NMR (d<sub>6</sub>-DMSO) 7.45 (2 H, d, *J*=7.5 Hz), 7.31 (2 H, d, *J*=7.5 Hz), 4.63 (2 H, s), 3.38 (6 H, t, *J*=7.5 Hz), 3.01 (6 H, t, *J*=7.5 Hz), 2.35 (2.35, s); <sup>13</sup>C NMR (d<sub>6</sub>-DMSO) 139.7, 133.1, 129.4, 124.4, 65.9, 51.3, 44.7, 20.8; MS (Micromass, ESI+) *m/z* = 471 (1%, [M<sub>2</sub><sup>37</sup>Cl]<sup>+</sup>), 469 (3%, [M<sub>2</sub><sup>35</sup>Cl]<sup>+</sup>), 218 (28%), 217 (100%, M<sup>+</sup>), 105 (7%, MeC<sub>6</sub>H<sub>4</sub>CH<sub>2</sub><sup>+</sup>). <sup>1</sup>H and <sup>13</sup>C NMR data correlate approximately with those given in the literature in a different solvent (CDCl<sub>3</sub>).<sup>3</sup>

**(d) 1-(4-methylbenzyl)-1-azoniabicyclo[2.2.2]octane chloride (MBABCO)**

To 1-azobicyclo[2.2.2]octane (0.301 g, 2.71 mmol), was added 10 mL of THF, and 4-methylbenzyl chloride (0.425 g, 3.02 mmol). This mixture was stirred at 30 °C for 65 hours. The solid was then washed and filtered with cold diethyl ether (4 x 10 mL), then dried under vacuum (0.559 g, 82.0%). <sup>1</sup>H-NMR (d<sub>6</sub>-DMSO) 7.40 (2 H, d, *J*=8.0 Hz), 7.31 (2 H, d, *J*=8.0 Hz), 4.40 (2 H, s) 3.41-3.38 (6 H, m), 2.35 (3 H, s), 2.05-2.01 (1 H, sep, *J*=3.2 Hz), 1.85-1.82 (6 H, m); <sup>13</sup>C NMR (d<sub>6</sub>-DMSO), 139.7, 132.9, 129.4, 124.8, 66.0, 53.5, 23.3, 20.8, 19.5. IR (cm<sup>-1</sup>) 2992, 2968, 2952, 2904, 2878, 1604, 1513, 1469, 1454; MS (Micromass, ESI) *m/z* = 217 (27%), 216 (100%, M<sup>+</sup>). <sup>1</sup>H and <sup>13</sup>C NMR data correlate approximately with those given in the literature in a different solvent (CDCl<sub>3</sub>).<sup>3</sup>

**(e) Benzyltris(2,4,6-trimethoxyphenyl)phosphonium chloride<sup>4</sup> (BTTMPP)**

To tris(2,4,6-trimethoxyphenyl)phosphine (3.20 g, 6.36 mmol) was added dry toluene (35 mL) under N<sub>2</sub>. Benzyl chloride (BnCl, 0.88 mL, 7.63 mmol) was added and the mixture heated at 105 °C for 21 h after which time a white precipitate formed.<sup>5</sup> The mixture was allowed to cool to rt and the precipitate was removed by filtration and washed with toluene (20 mL) followed by diethyl ether (2 × 15 mL). The solid was transferred to a flask with the aid of methanol, the solvent was then evaporated and the sample dried *in vacuo*. The resultant solid was recrystallised from ethyl acetate/diethyl ether to give the title compound as white crystals (2.01 g, 50%); m.p. 218-220 °C; IR (cm<sup>-1</sup>) 2979, 2841, 1594, 1575, 1454, 1413; <sup>1</sup>H-NMR (CDCl<sub>3</sub>) 7.07-7.03 (3 H, m), 7.00-6.96 (2 H, m), 6.06 (6 H, d, *J*<sub>H-P</sub>=4.7 Hz), 4.60 (2 H, d, *J*<sub>H-P</sub>=17.3 Hz), 3.86 (9 H, s), 3.62 (18 H, s); <sup>13</sup>C NMR (CDCl<sub>3</sub>) 165.6 (d, *J*<sub>C-P</sub>=1.6 Hz), 163.4 (d, *J*<sub>C-P</sub>=1.2 Hz), 133.2 (d, *J*<sub>C-P</sub>=6.8 Hz), 129.2 (d, *J*<sub>C-P</sub>=8.7 Hz), 127.9 (d, *J*<sub>C-P</sub>=1.9 Hz), 126.9 (d, *J*<sub>C-P</sub>=3.1 Hz), 92.9 (s), 92.1 (s), 90.9 (d, *J*<sub>C-P</sub>=7.3 Hz), 55.9 (s), 55.9 (d, *J*<sub>C-P</sub>=2.8 Hz); <sup>31</sup>P NMR (D<sub>2</sub>O) 5.49 (m); MS (Waters, ESI+) *m/z* = 623 (100%, M<sup>+</sup>).

**References to ESI**

1. A. L. Ong, D. K. Whelligan, M. L. Fox and J. R. Varcoe, *Phys. Chem. Chem. Phys.*, 2013, **15**, 18992-19000.
2. Y. Itoh, S. Horiuchi, K. Yamamoto *Photochem. Photobiol. Sci.* 2005, **4**, 835-839.
3. R. Robiette, M. Conza, V. K. Aggarwal, *Org. Biomol. Chem.* 2006, **4**, 621-623.
4. S. Gu, W. Sheng, R. Cai, S. M. Alia, S. Song, K. O. Jensen and Y. Yan, *Chem. Commun.*, 2013, **49**, 131-133.
5. Y.-S. Kim, C.-T. Yang, J. Wang, L. Wang, Z.-B. Li, X. Chen and S. Liu, *J. Med. Chem.*, 2008, **51**, 2971-2984.

**Figure ESI2** Example NMR spectra: benzyltris(2,4,6-trimethoxyphenyl)phosphonium chloride (**BTMPP**)

Benzyltris(2,4,6-trimethoxyphenyl)phosphonium chloride <sup>1</sup>H NMR (500 MHz, CDCl<sub>3</sub>)

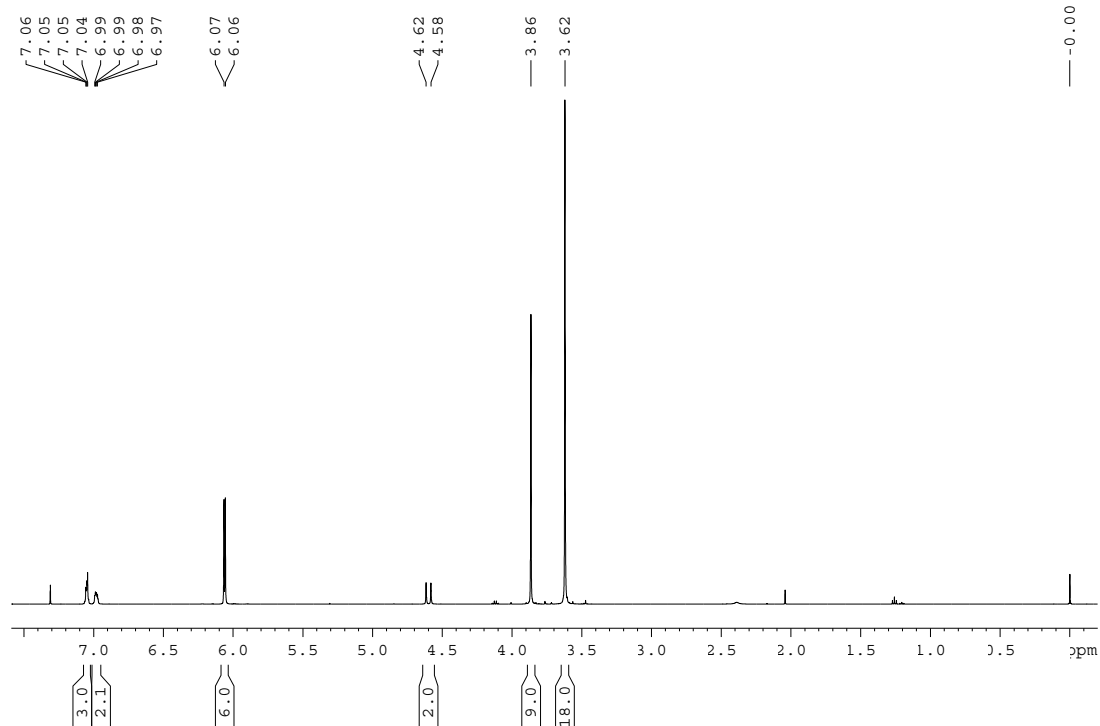

Benzyltris(2,4,6-trimethoxyphenyl)phosphonium chloride <sup>13</sup>C NMR (125 MHz, CDCl<sub>3</sub>)

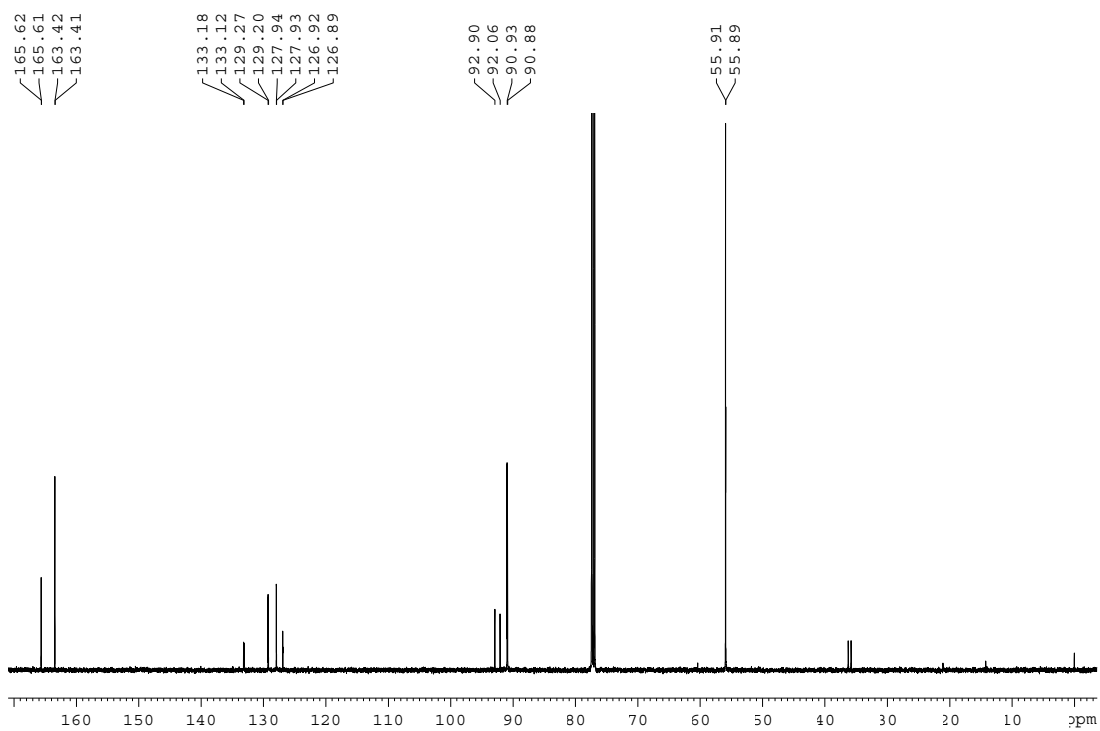

Benzyltris(2,4,6-trimethoxyphenyl)phosphonium chloride 31P NMR (202 MHz, D2O)

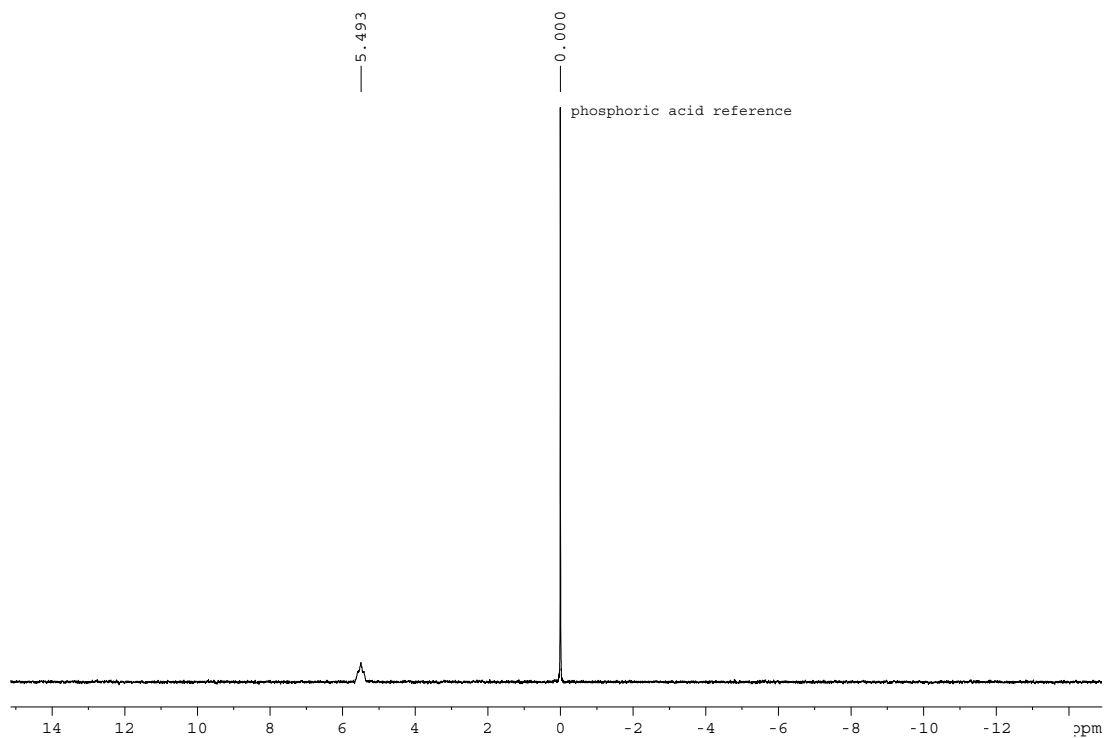

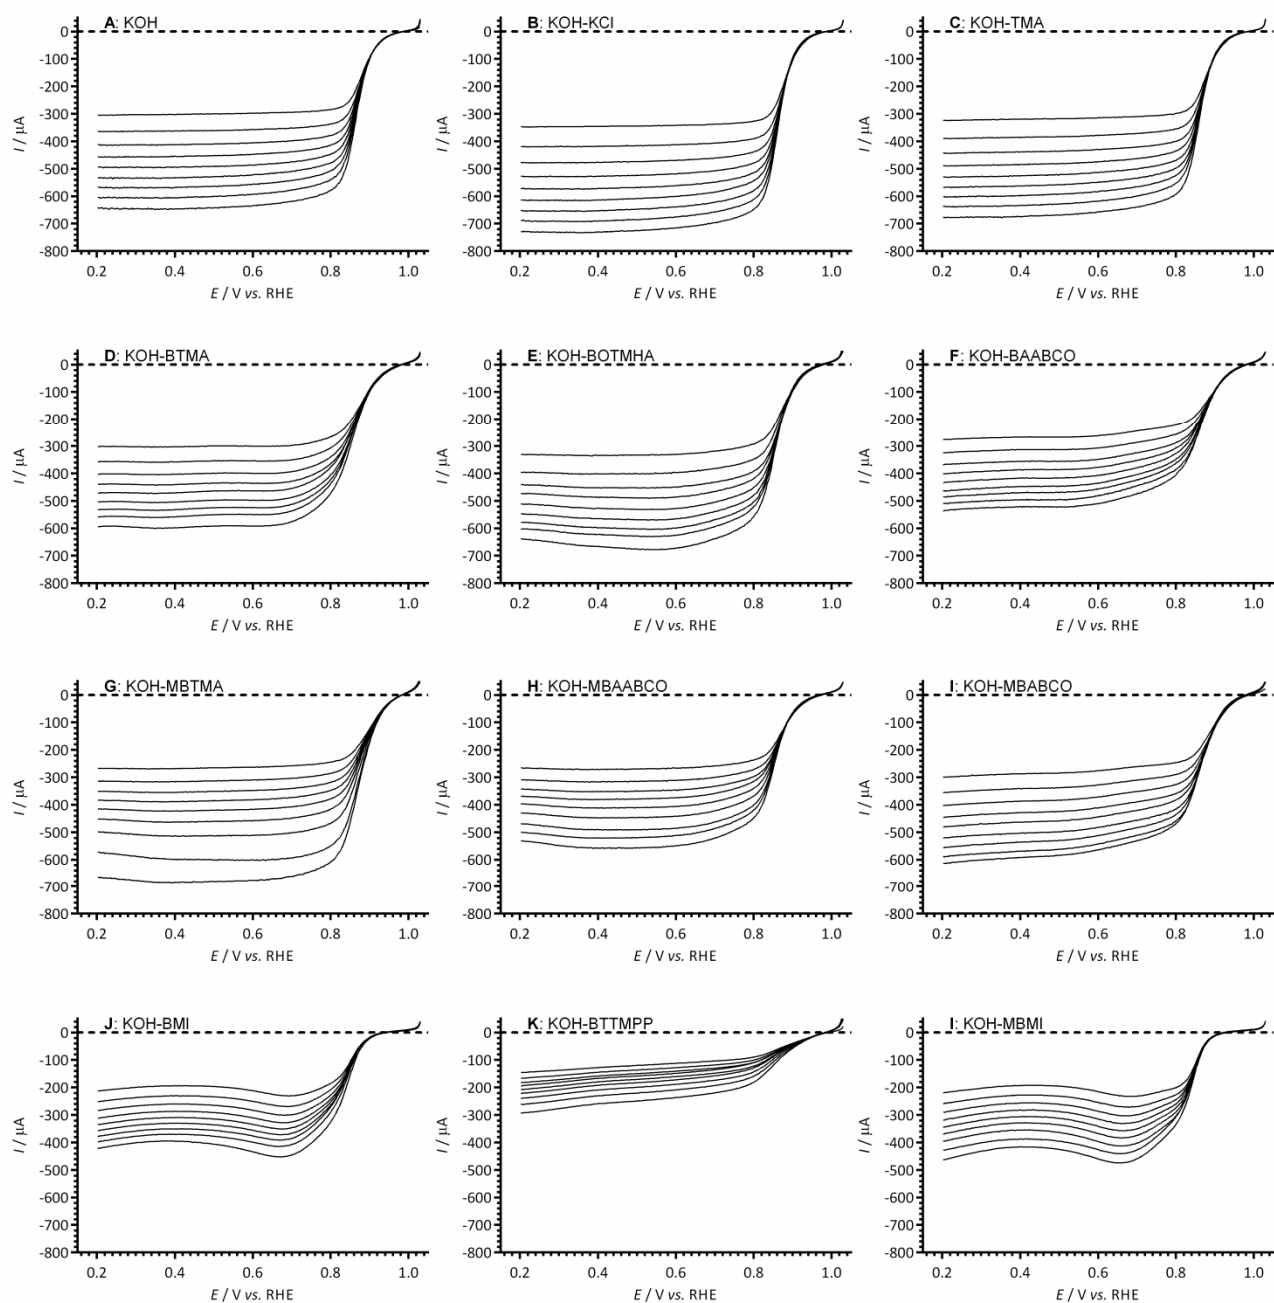

**Fig. ES13** The linear sweep hydrodynamic voltammograms at 25 °C of a Pt/C-coated GC disk electrode in the O<sub>2</sub>-saturated alkaline electrolytes with and without addition of 1 mmol dm<sup>-3</sup> of KCl or the model cationic head-group molecules. Scan rate = 5 mV s<sup>-1</sup> and RDE rotation rates in the range 400 - 2000 rpm. This is the raw data linked to Figure 6 and 7 and Table 1 in the main article.

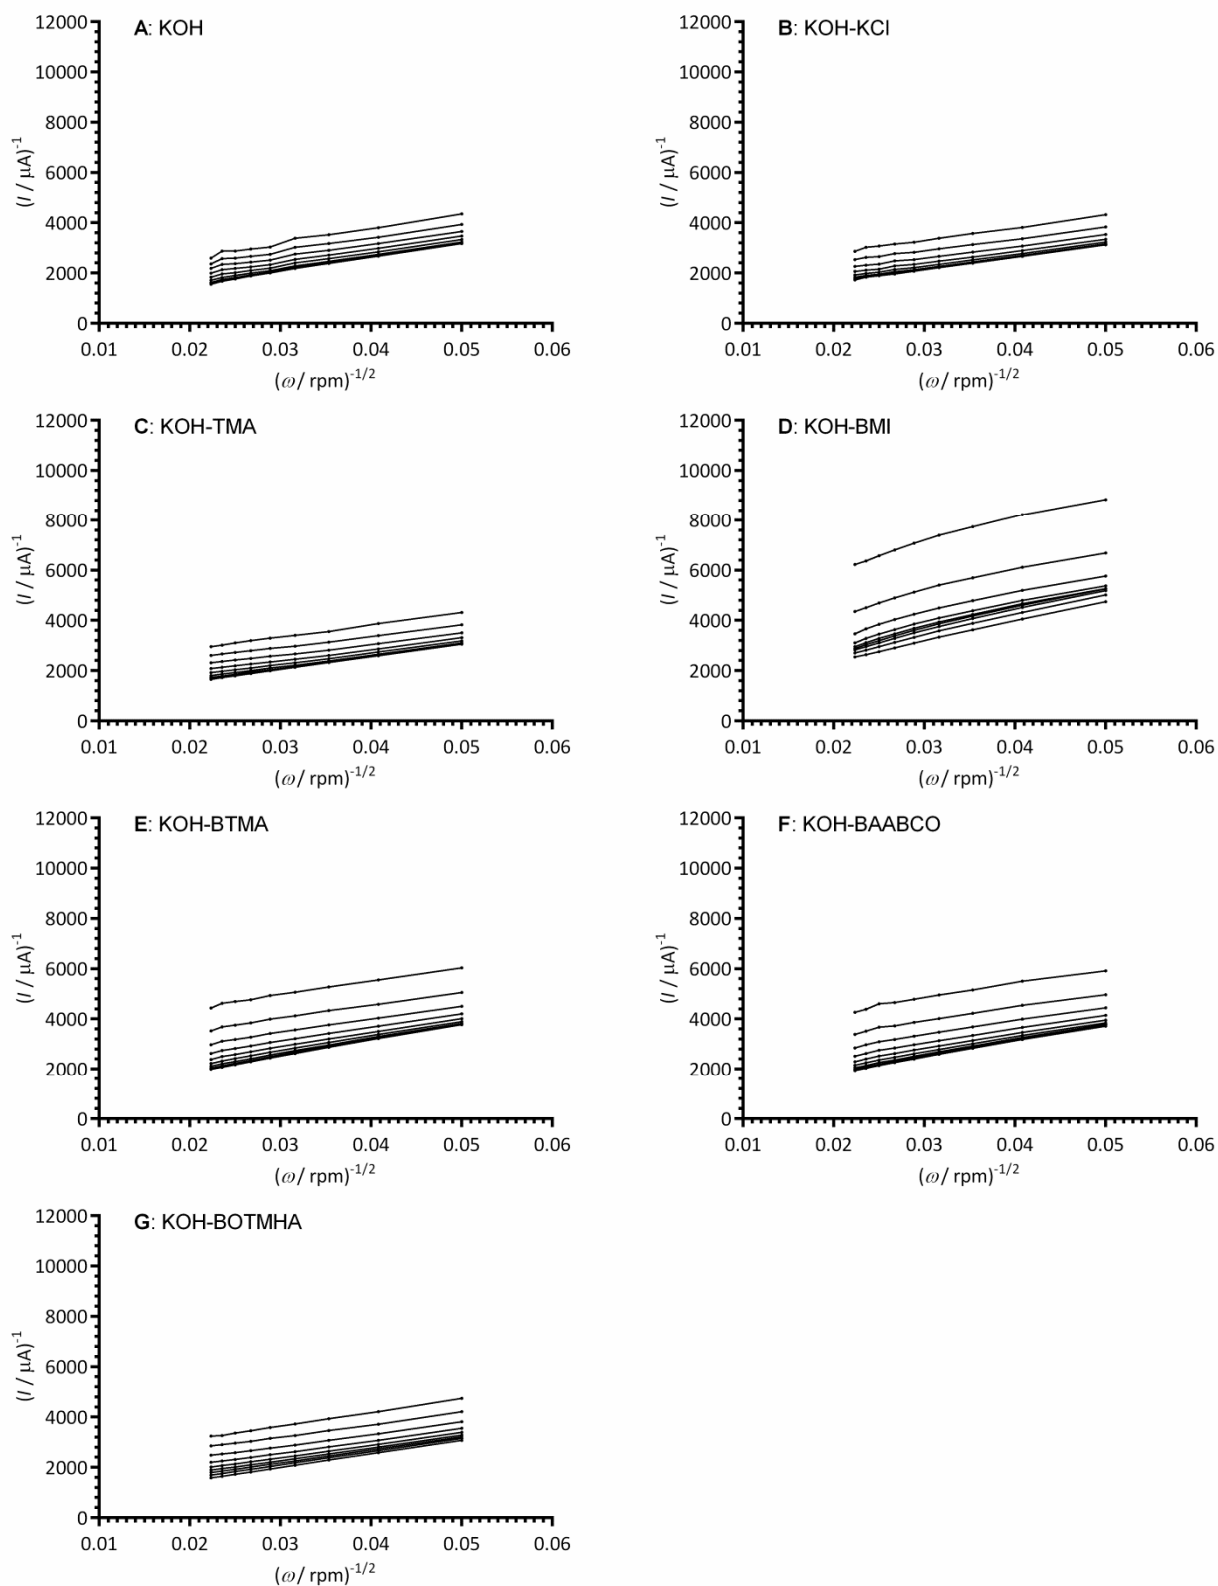

**Fig. ESI4** The Koutecky - Levich plots of a Pt/C-coated GC disk electrode in the  $O_2$ -saturated alkaline electrolytes at  $25^\circ C$  with and without addition of  $1 \text{ mmol dm}^{-3}$  of KCl or the model cationic head-group molecules. Scan rate =  $5 \text{ mV s}^{-1}$  and RDE rotation rates in the range 400 - 2000 rpm. This is the raw data linked to Figures 6 and 7 and Table 1 in the main article.
